# Supplementary material for: Altered intestinal microbiota in patients with chronic pancreatitis: implications in diabetes and metabolic abnormalities
Source: PubMed Central journal article supplement (PMC5334648; doi:10.1038/srep43640), 2017-03-03
Supplement: srep43640-s1.pdf [file srep43640-s1.pdf]

*Supplementary materials:*

**Altered intestinal microbiota in patients with chronic pancreatitis: implications in diabetes and metabolic abnormalities.**

Sai Manasa Jandhayala, A. Madhulika, G. Deepika, G Venkat Rao, D Nageshwar Reddy, Chivukula Subramanyam, Mitnala Sasikala, Rupjyoti Talukdar.

## Supplementary Table S1: Dietary details of individual controls and patients.

The proximate principles were calculated using nutritive value of Indian Foods. The numbers from 1-7 in the columns showing individual dietary components indicate the number of times the patient's/control's included those food items in a week; 8 indicates use once a fortnight; 9 indicates once a month; and 10 indicates never included. Information on dietary intake was obtained from 24hr recall and food frequency questionnaire.

| Group     | ID        | Energy (kcal) | Protein (gm) | Carbohy drate (gm) | Fat (gm) | Rice | Wheat | Other cereals | Dals | Lentils | Others pulses | Leafy vegetabl es | Roots and tubers | Other vegetabl es | Fruits | Nuts and oilseeds | Milk and milk products | Fats and oils | Meat product |
|-----------|-----------|---------------|--------------|--------------------|----------|------|-------|---------------|------|---------|---------------|-------------------|------------------|-------------------|--------|-------------------|------------------------|---------------|--------------|
| Control1  | 4600001.3 | 1364          | 55           | 177                | 41       | 7    | 3     | 10            | 6    | 1       | 1             | 2                 | 2                | 2                 | 7      | 1                 | 7                      | 7             | 2            |
| Control2  | 4584129.3 | 1373          | 47           | 181                | 42       | 7    | 2     | 1             | 7    | 10      | 10            | 3                 | 6                | 6                 | 2      | 9                 | 7                      | 7             | 7            |
| Control3  | 4600002.3 | 1396          | 44           | 195                | 35       | 6    | 1     | 1             | 5    | 1       | 10            | 2                 | 6                | 3                 | 2      | 6                 | 6                      | 7             | 7            |
| Control4  | 4622474.3 | 1238          | 55           | 124                | 29       | 7    | 1     | 10            | 6    | 1       | 1             | 2                 | 7                | 4                 | 1      | 2                 | 7                      | 7             | 5            |
| Control5  | 4584133.3 | 1271          | 41           | 182                | 35       | 7    | 2     | 10            | 7    | 1       | 10            | 2                 | 3                | 6                 | 1      | 5                 | 7                      | 7             | 4            |
| Control6  | 4600020.3 | 1375          | 50           | 111                | 21       | 6    | 2     | 10            | 6    | 1       | 1             | 2                 | 2                | 4                 | 3      | 6                 | 7                      | 7             | 5            |
| Control7  | 4584456.3 | 1151          | 42           | 153                | 23       | 5    | 4     | 10            | 5    | 10      | 1             | 2                 | 1                | 3                 | 1      | 9                 | 7                      | 7             | 2            |
| Control8  | 4584455.3 | 1248          | 45           | 195                | 21       | 7    | 6     | 10            | 6    | 10      | 1             | 3                 | 1                | 1                 | 2      | 9                 | 7                      | 7             | 2            |
| Control9  | 4584593.3 | 1250          | 60           | 195                | 40       | 7    | 7     | 10            | 7    | 1       | 10            | 3                 | 6                | 7                 | 3      | 9                 | 7                      | 7             | 1            |
| Control10 | 4600000.3 | 1170          | 50           | 240                | 38       | 7    | 1     | 10            | 7    | 1       | 2             | 2                 | 6                | 3                 | 6      | 9                 | 7                      | 7             | 2            |
| CPND1     | 4622479.3 | 1107          | 50           | 233                | 21       | 6    | 6     | 10            | 2    | 1       | 10            | 1                 | 2                | 1                 | 2      | 8                 | 7                      | 7             | 10           |
| CPND2     | 4584718.3 | 1127          | 34           | 171                | 33       | 7    | 7     | 10            | 1    | 1       | 10            | 2                 | 3                | 8                 | 8      | 10                | 10                     | 7             | 10           |
| CPND3     | 4600013.3 | 1042          | 52           | 208                | 23       | 7    | 2     | 10            | 7    | 10      | 10            | 1                 | 1                | 1                 | 3      | 7                 | 1                      | 7             | 2            |
| CPND4     | 4584253.3 | 1089          | 43           | 216                | 21       | 7    | 7     | 10            | 7    | 10      | 1             | 10                | 1                | 7                 | 1      | 1                 | 7                      | 7             | 7            |
| CPND5     | 4584721.3 | 1844          | 50           | 237                | 30       | 7    | 7     | 10            | 7    | 7       | 7             | 7                 | 7                | 1                 | 1      | 10                | 7                      | 7             | 1            |
| CPND6     | 4584262.3 | 1411          | 46           | 153                | 20       | 7    | 10    | 10            | 7    | 10      | 10            | 8                 | 1                | 8                 | 9      | 9                 | 3                      | 7             | 4            |
| CPND7     | 4600014.3 | 1080          | 34           | 316                | 23       | 7    | 7     | 10            | 2    | 3       | 10            | 10                | 7                | 6                 | 1      | 9                 | 7                      | 7             | 2            |
| CPND8     | 4622481.3 | 1196          | 67           | 229                | 46       | 6    | 5     | 10            | 1    | 10      | 1             | 2                 | 6                | 5                 | 7      | 1                 | 1                      | 7             | 8            |
| CPND9     | 4600015.3 | 1156          | 41           | 179                | 22       | 7    | 6     | 10            | 6    | 1       | 1             | 2                 | 4                | 6                 | 6      | 2                 | 1                      | 7             | 7            |
| CPND10    | 4622480.3 | 1055          | 28           | 150                | 25       | 7    | 10    | 10            | 2    | 7       | 10            | 10                | 7                | 7                 | 7      | 10                | 10                     | 7             | 10           |
| CPND11    | 4584237.3 | 1799          | 55           | 297                | 40       | 7    | 1     | 10            | 8    | 3       | 10            | 1                 | 4                | 1                 | 3      | 8                 | 1                      | 7             | 1            |
| CPND12    | 4584614.3 | 1245          | 55           | 134                | 16       | 7    | 9     | 10            | 1    | 1       | 10            | 1                 | 2                | 4                 | 4      | 9                 | 2                      | 7             | 10           |
| CPND13    | 4600011.3 | 1216          | 30           | 183                | 32       | 6    | 5     | 10            | 3    | 2       | 6             | 3                 | 3                | 3                 | 5      | 3                 | 3                      | 7             | 7            |
| CPND14    | 4600012.3 | 918           | 13           | 103                | 10       | 5    | 5     | 10            | 3    | 3       | 6             | 3                 | 2                | 3                 | 6      | 2                 | 2                      | 7             | 5            |
| CPND15    | 4600016.3 | 1380          | 62           | 191                | 38       | 7    | 6     | 10            | 3    | 2       | 6             | 3                 | 2                | 3                 | 4      | 1                 | 4                      | 7             | 4            |
| CPND16    | 4584261.3 | 1142          | 32           | 258                | 33       | 7    | 2     | 10            | 7    | 10      | 10            | 9                 | 8                | 1                 | 2      | 1                 | 1                      | 7             | 7            |
| CPD1      | 4600008.3 | 883           | 35           | 166                | 24       | 7    | 7     | 9             | 7    | 9       | 10            | 1                 | 2                | 2                 | 9      | 6                 | 8                      | 7             | 2            |
| CPD2      | 4600009.3 | 1799          | 74           | 218                | 45       | 7    | 8     | 10            | 7    | 10      | 10            | 9                 | 8                | 2                 | 1      | 10                | 10                     | 7             | 10           |
| CPD3      | 4622475.3 | 1020          | 36           | 275                | 27       | 7    | 7     | 10            | 7    | 10      | 10            | 8                 | 1                | 7                 | 1      | 1                 | 1                      | 7             | 2            |
| CPD4      | 4600010.3 | 1195          | 46           | 230                | 25       | 7    | 10    | 7             | 7    | 7       | 10            | 9                 | 4                | 4                 | 4      | 1                 | 5                      | 7             | 4            |
| CPD5      | 4584457.3 | 1040          | 30           | 194                | 19       | 7    | 6     | 10            | 6    | 3       | 1             | 9                 | 6                | 6                 | 6      | 9                 | 6                      | 7             | 10           |
| CPD6      | 4584598.3 | 1682          | 68           | 255                | 47       | 6    | 8     | 10            | 5    | 3       | 1             | 9                 | 6                | 6                 | 4      | 8                 | 6                      | 7             | 10           |
| CPD7      | 4622476.3 | 1401          | 44           | 207                | 30       | 7    | 7     | 10            | 6    | 3       | 1             | 9                 | 6                | 2                 | 3      | 9                 | 4                      | 7             | 3            |
| CPD8      | 4622477.3 | 1038          | 40           | 182                | 21       | 7    | 7     | 9             | 5    | 2       | 1             | 9                 | 1                | 2                 | 3      | 8                 | 3                      | 7             | 8            |
| CPD9      | 4622478.3 | 1134          | 37           | 186                | 22       | 5    | 5     | 9             | 7    | 2       | 1             | 9                 | 2                | 2                 | 5      | 4                 | 2                      | 7             | 10           |
| CPD10     | 4600003.3 | 1630          | 51           | 275                | 27       | 6    | 6     | 9             | 7    | 2       | 10            | 3                 | 2                | 10                | 4      | 10                | 5                      | 7             | 6            |
| CPD11     | 4600004.3 | 1353          | 27           | 325                | 29       | 7    | 4     | 10            | 7    | 1       | 1             | 3                 | 3                | 2                 | 2      | 12                | 7                      | 7             | 5            |
| CPD12     | 4600005.3 | 1654          | 49           | 430                | 37       | 7    | 6     | 10            | 7    | 1       | 10            | 3                 | 1                | 1                 | 1      | 6                 | 6                      | 7             | 5            |
| CPD 13    | 4600006.3 | 1164          | 39           | 180                | 34       | 7    | 5     | 9             | 7    | 1       | 10            | 3                 | 1                | 2                 | 9      | 5                 | 1                      | 7             | 3            |
| CPD 14    | 4600007.3 | 1252          | 46           | 218                | 18       | 7    | 7     | 9             | 7    | 2       | 10            | 3                 | 3                | 3                 | 8      | 4                 | 1                      | 7             | 2            |

**Supplementary Table S2:** Sequence characteristics, metagenomic quantity/quality, richness and diversity of intestinal microbiota.

|           | Patient ID | Disease category                             | Post QC sequence count | Post QC sequence length (bp $\pm$ SD) | Metagenomic quantity (ng/ $\mu$ l) | Metagenomic quality (A260/280) | Chao1 | Shannon index |
|-----------|------------|----------------------------------------------|------------------------|---------------------------------------|------------------------------------|--------------------------------|-------|---------------|
| Control1  | 4600001.3  | Healthy control (n=10)                       | 346,009                | 422 $\pm$ 73                          | 242.4                              | 1.82                           | 111   | 2.25          |
| Control2  | 4584129.3  |                                              | 515,182                | 364 $\pm$ 147                         | 214.3                              | 2.15                           | 82    | 2.47          |
| Control3  | 4600002.3  |                                              | 330,699                | 371 $\pm$ 119                         | 647.8                              | 2.13                           | 102   | 2.00          |
| Control4  | 4622474.3  |                                              | 891,169                | 388 $\pm$ 145                         | 331.3                              | 2.14                           | 101   | 2.04          |
| Control5  | 4584133.3  |                                              | 387,765                | 356 $\pm$ 152                         | 196.2                              | 2.12                           | 116   | 2.08          |
| Control6  | 4600020.3  |                                              | 337,751                | 343 $\pm$ 130                         | 381.2                              | 2.13                           | 94    | 2.42          |
| Control7  | 4584456.3  |                                              | 625,510                | 419 $\pm$ 113                         | 317.9                              | 2.17                           | 121   | 2.28          |
| Control8  | 4584455.3  |                                              | 450,811                | 414 $\pm$ 112                         | 245.5                              | 2.15                           | 93    | 2.15          |
| Control9  | 4584593.3  |                                              | 423,013                | 420 $\pm$ 113                         | 285.3                              | 2.07                           | 102   | 1.98          |
| Control10 | 4600000.3  |                                              | 322,656                | 420 $\pm$ 75                          | 181.5                              | 2.17                           | 113   | 1.84          |
| CPND1     | 4622479.3  | Chronic pancreatitis without diabetes (n=16) | 571,360                | 410 $\pm$ 116                         | 222.5                              | 2.13                           | 134   | 2.02          |
| CPND2     | 4584718.3  |                                              | 411,513                | 413 $\pm$ 117                         | 361.9                              | 2.12                           | 51    | 2.64          |
| CPND3     | 4600013.3  |                                              | 279,982                | 451 $\pm$ 15                          | 178.6                              | 2.13                           | 41    | 2.39          |
| CPND4     | 4584253.3  |                                              | 775,700                | 370 $\pm$ 148                         | 407.8                              | 2.13                           | 50    | 2.15          |
| CPND5     | 4584721.3  |                                              | 415,009                | 413 $\pm$ 111                         | 180.9                              | 2.19                           | 63    | 2.04          |
| CPND6     | 4584262.3  |                                              | 610,189                | 370 $\pm$ 144                         | 561.5                              | 2.12                           | 69    | 2.62          |
| CPND7     | 4600014.3  |                                              | 55,180                 | 428 $\pm$ 144                         | 290.5                              | 2.13                           | 66    | 1.52          |
| CPND8     | 4622481.3  |                                              | 604,179                | 428 $\pm$ 99                          | 378.9                              | 2.17                           | 117   | 2.23          |
| CPND9     | 4600015.3  |                                              | 340,323                | 442 $\pm$ 11                          | 157.2                              | 2.12                           | 107   | 2.12          |
| CPND10    | 4622480.3  |                                              | 973,267                | 410 $\pm$ 125                         | 110.3                              | 2.17                           | 90    | 2.35          |
| CPND11    | 4584237.3  |                                              | 489,279                | 364 $\pm$ 150                         | 228.8                              | 2.13                           | 107   | 2.33          |
| CPND12    | 4584614.3  |                                              | 557,622                | 411 $\pm$ 114                         | 233.1                              | 2.19                           | 118   | 2.24          |
| CPND13    | 4600011.3  |                                              | 276,662                | 423 $\pm$ 72                          | 246.1                              | 2.16                           | 91    | 2.06          |
| CPND14    | 4600012.3  |                                              | 175,232                | 420 $\pm$ 66                          | 289.3                              | 2.14                           | 104   | 2.38          |
| CPND15    | 4600016.3  |                                              | 246,822                | 380 $\pm$ 122                         | 256.3                              | 1.71                           | 94    | 1.78          |
| CPND16    | 4584261.3  |                                              | 11,575                 | 198 $\pm$ 131                         | 171.4                              | 2.15                           | 95    | 1.99          |
| CPD1      | 4600008.3  | Chronic pancreatitis with diabetes (n=14)    | 17,618                 | 360 $\pm$ 85                          | 247.6                              | 1.88                           | 116   | 2.19          |
| CPD2      | 4600009.3  |                                              | 351,046                | 371 $\pm$ 120                         | 112.7                              | 2.07                           | 39    | 2.18          |
| CPD3      | 4622475.3  |                                              | 547,780                | 402 $\pm$ 122                         | 310.2                              | 1.86                           | 74    | 2.05          |
| CPD4      | 4600010.3  |                                              | 319,333                | 405 $\pm$ 82                          | 213.1                              | 2.22                           | 29    | 1.82          |
| CPD5      | 4584457.3  |                                              | 483,061                | 414 $\pm$ 116                         | 486.6                              | 2.02                           | 69    | 2.14          |
| CPD6      | 4584598.3  |                                              | 445,616                | 419 $\pm$ 114                         | 644.5                              | 2.16                           | 58    | 1.57          |
| CPD7      | 4622476.3  |                                              | 671,154                | 417 $\pm$ 114                         | 365.3                              | 2.12                           | 114   | 2.18          |
| CPD8      | 4622477.3  |                                              | 401,007                | 410 $\pm$ 111                         | 280.4                              | 2.16                           | 42    | 1.66          |
| CPD9      | 4622478.3  |                                              | 848,237                | 419 $\pm$ 115                         | 304.9                              | 2.04                           | 63    | 1.96          |
| CPD10     | 4600003.3  |                                              | 227,616                | 437 $\pm$ 53                          | 370.3                              | 2.11                           | 49    | 1.87          |
| CPD11     | 4600004.3  |                                              | 265,847                | 440 $\pm$ 46                          | 264.4                              | 2.16                           | 46    | 1.79          |
| CPD12     | 4600005.3  |                                              | 312,204                | 441 $\pm$ 48                          | 239.1                              | 2.15                           | 41    | 2.15          |
| CPD13     | 4600006.3  |                                              | 232,960                | 440 $\pm$ 58                          | 474.2                              | 2.11                           | 92    | 2.06          |
| CPD14     | 4600007.3  |                                              | 187,466                | 444 $\pm$ 47                          | 274.2                              | 2.03                           | 44    | 2.08          |

**Supplementary Table S3:** Comparison of study parameters between individual groups.

|                                                             |              | Healthy control v/s CP without diabetes | Healthy control v/s CP with diabetes | CP without diabetes v/s CP with diabetes |
|-------------------------------------------------------------|--------------|-----------------------------------------|--------------------------------------|------------------------------------------|
| <b>Chao 1</b>                                               | Median (IQR) | 101.5 (22) v/s 92.5 (43)                | 101.5 (22) v/s 53.5.5 (37)           | 92.5 (43) v/s 53.5.5 (37)                |
|                                                             | p value      | 0.17                                    | <b>0.002*</b>                        | <b>0.02*</b>                             |
| <b>Shannon index</b>                                        | Median (IQR) | 2.2 (0.33) v/s 2.2 (0.35)               | 2.2 (0.33) v/s 2.05 (0.34)           | 2.2 (0.35) v/s 2.05 (0.34)               |
|                                                             | p value      | 0.78                                    | <b>0.04*</b>                         | <b>0.05*</b>                             |
| <b>Firmicutes: Bacteroidetes</b>                            | Median (IQR) | 1.01 (0.91) v/s 1.5 (0.95)              | 1.01 (0.91) v/s 1.89 (2.12)          | 1.5 (0.95) v/s 1.89 (2.12)               |
|                                                             | p value      | 0.17                                    | <b>0.04*</b>                         | 0.37                                     |
| <b><i>Fecalibacterium praunitzii</i> relative abundance</b> | Median (IQR) | 0.17 (0.12) v/s 0.12 (0.03)             | 0.17 (0.12) v/s 0.09 (0.03)          | 0.12 (0.03) v/s 0.09 (0.03)              |
|                                                             | p value      | <b>0.03*</b>                            | <b>0.001*</b>                        | <b>0.005*</b>                            |
| <b><i>Ruminococcus bromii</i> relative abundance</b>        | Median (IQR) | 0.09 (0.04) v/s 0.02 (0.06)             | 0.09 (0.04) v/s 0.004 (0.02)         | 0.02 (0.06) v/s 0.004 (0.02)             |
|                                                             | p value      | <b>0.01*</b>                            | <b>0.001*</b>                        | <b>0.04*</b>                             |
| <b>LPS synthetic pathway abundance</b>                      | Median (IQR) | 0.0001 (0.004) v/s 0.09 (0.08)          | 0.0001 (0.004) v/s 0.22 (0.16)       | 0.09 (0.08) v/s 0.22 (0.16)              |
|                                                             | p value      | <b>0.006*</b>                           | <b>0.01*</b>                         | 0.06                                     |
| <b>Plasma endotoxin level (EU/mL)</b>                       | Median (IQR) | 0.32 (0.09) v/s 0.51 (0.11)             | 0.32 (0.09) v/s 1.01 (0.36)          | 0.51 (0.11) v/s 1.01 (0.36)              |
|                                                             | p value      | <b>0.0007*</b>                          | <b>0.0002*</b>                       | <b>0.001*</b>                            |

Mann Whitney U test was used for the comparisons; \* indicates statistical significance

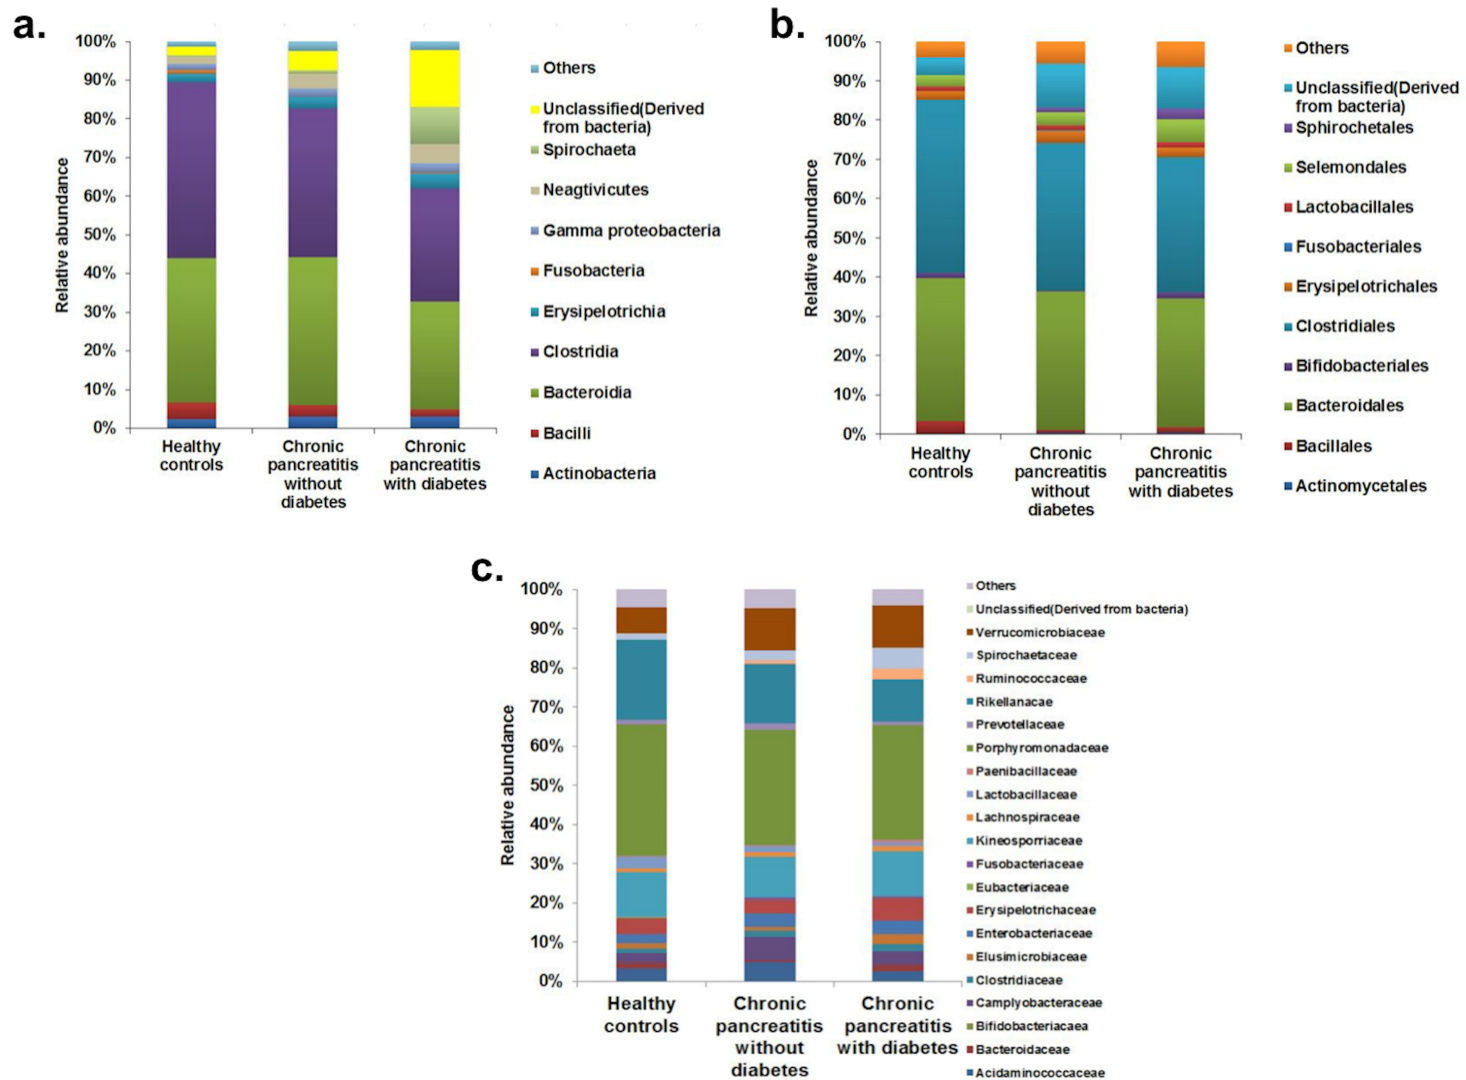

**Supplementary figure S1:** Stacked bar diagrams depicting the differences in relative abundances of gut microbiota between healthy controls, CP without diabetes and CP with diabetes at the **(a)** class, **(b)** family and **(c)** order level taxa. There were no statistically significant differences between any of the organisms between the three groups.

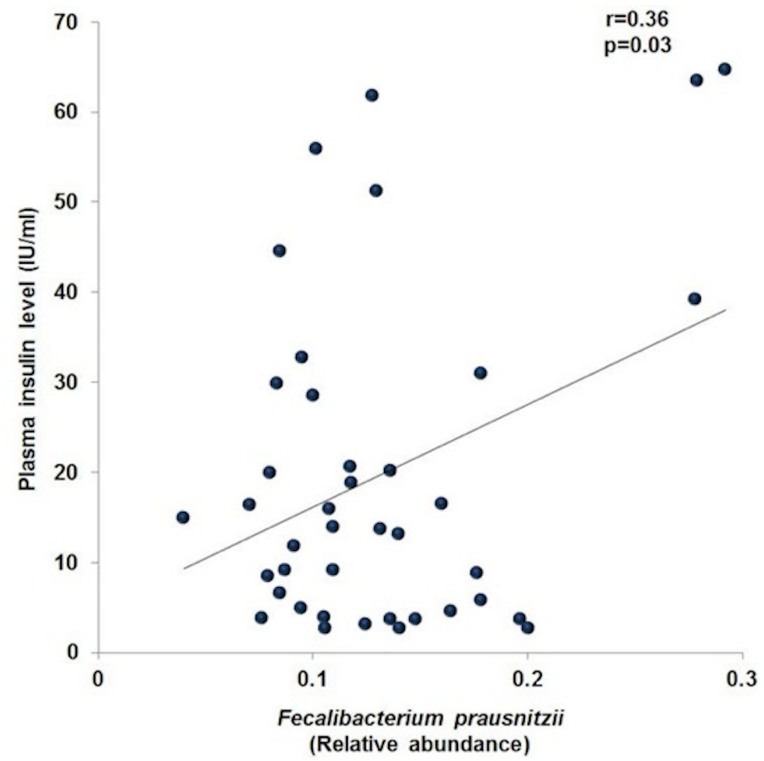

**Supplementary figure S2:** Significant positive correlation of *Faecalibacterium prausnitzii* abundance with plasma insulin levels.

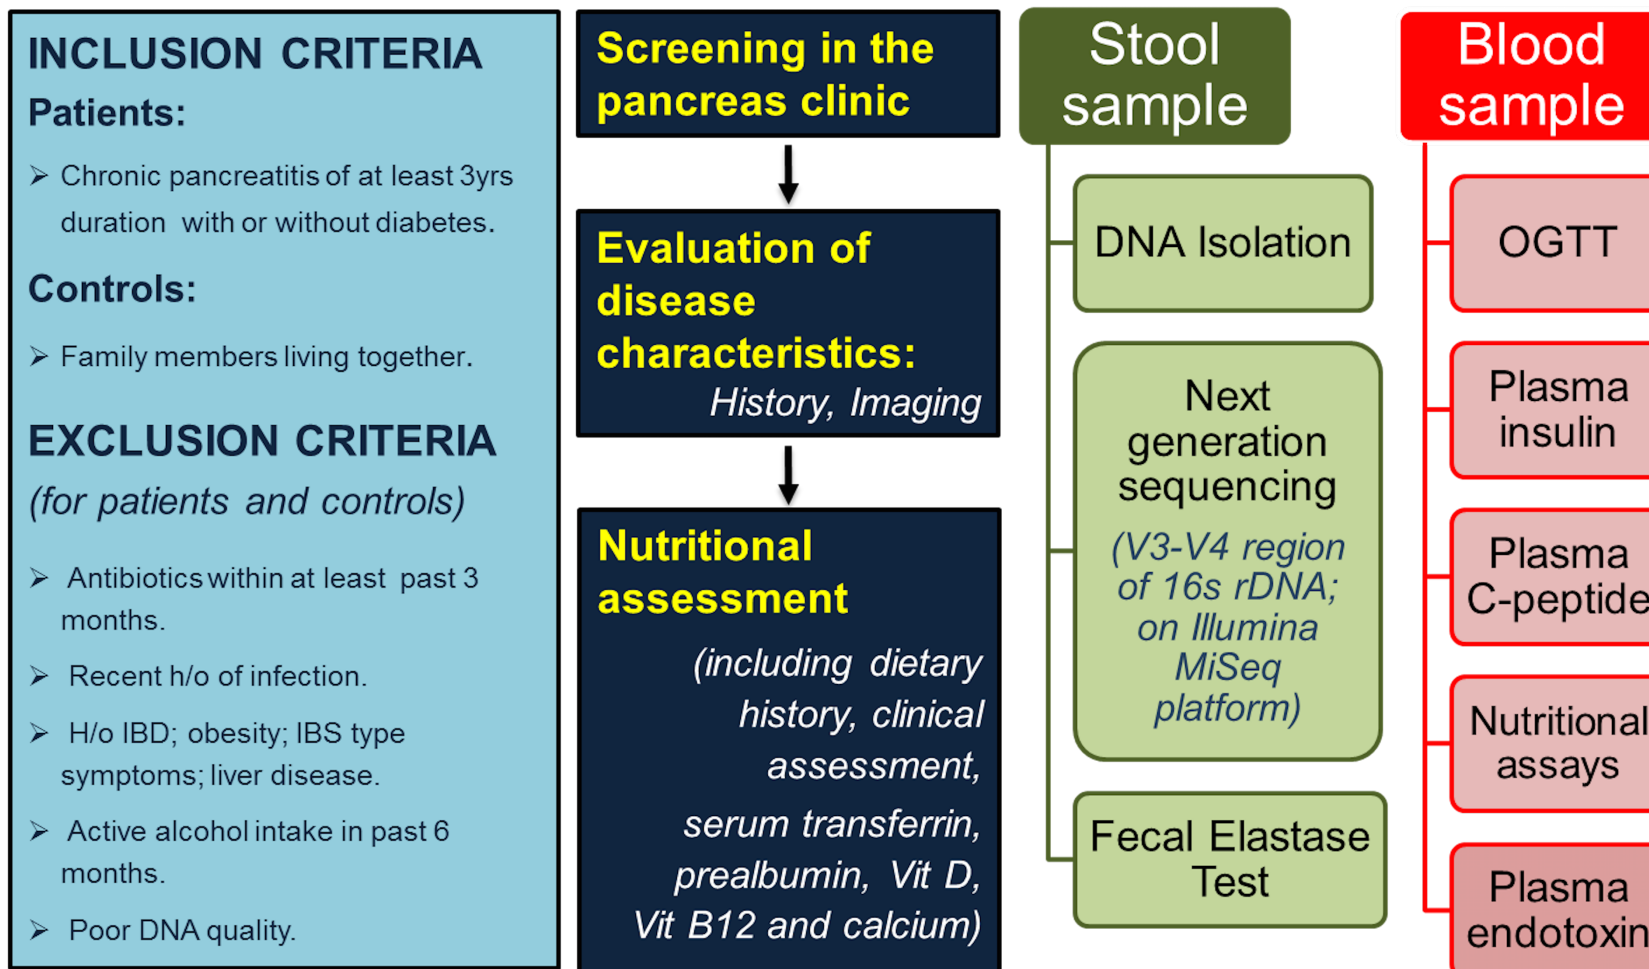

**Supplementary figure S3:** Schematic representation of study design.
